# Supplementary material
Source: MDPI journal article supplement (https://www.mdpi.com/2077-1312/9/12/1377)
Supplement: s1 [file s1 › jmse-1452490-supplementary.pdf]

Supplementary Data

**Table S1.** Detailed cost estimates of transplanting corals adjoining to promote nonfusion (“what-if” scenario 1) or separate (“what-if” scenario 2).

| Activity                            | Equipment<br>Cost (US\$) | Time Input by Personnel   |               |              | Dive Gear Hire |              | SCUBA Air Tank |             | Boat Time |                 | Sub-<br>Total<br>(US\$) |
|-------------------------------------|--------------------------|---------------------------|---------------|--------------|----------------|--------------|----------------|-------------|-----------|-----------------|-------------------------|
|                                     |                          | Person-Hours (h)          | Rate (US\$/h) | Costs (US\$) | Units          | Costs (US\$) | Units          | Costs(US\$) | Days      | Costs(US\$/day) |                         |
| 1. Collection of<br>source material | 31.67                    | 1.5 X 2 people            | 15.08/7.54*   | 33.93        | 2              | 52.78        | 4              | 60.15       | 1         | 488.72          | 667.25                  |
| 2. Transplantation                  | 217.19                   | 1.5 x 4 people            | 15.08/7.54*   | 67.86        | 4              | 105.56       | 8              | 120.30      | 1         | 488.72          | 999.63                  |
| 3. Monitoring &<br>maintenance      | 3.02                     | 1.5 X 2 people X 11 trips | 15.08/7.54*   | 373.23       | 22             | 580.58       | 44             | 661.65      | 11        | 5375.94         | 6994.42                 |

Cost estimates for collecting 1000 cm<sup>2</sup> of *Platygyra sinensis* followed by transplanting 100 fragments of 9 cm<sup>2</sup> each, with subsequent monthly monitoring and maintenance for a year. The cost for each activity was calculated following Toh et al. [see 17], for a monitoring period of one year. The costs for SCUBA gear hire, air tank and boat were estimated based on local commercial rates. All published rates are correct as of May 2021, and all costs were estimated in Singapore Dollars (S\$) prior to conversion to US\$ at the rate of S\$ 1.33 = US\$ 1. \* Personnel involved in the study corresponded to skill levels 2 and 3 described in Edwards et al. [see 72], and local hiring rates in the National University of Singapore (NUS) were adopted.
